# Supplementary material for: 1,2-Diarylbenzene as fast T-type photochromic switch
Source: Royal Society of Chemistry journal article supplement (doi:10.1039/c8tc05357j), 2019-01-01
Supplement: c8tc05357j1.pdf [file c8tc05357j1.pdf]

Supplementary Information for

## 1,2-Diarylbenzene as Fast T-type Photochromic Switch

Daichi Kitagawa\*, Tatsumoto Nakahama, Yoshihiro Nakai and Seiya Kobatake\*

Department of Applied Chemistry, Graduate School of Engineering, Osaka City University, 3-3-  
138 Sugimoto, Sumiyoshi-ku, Osaka 558-8585, Japan

\*E-mail: [kitagawa@osaka-cu.ac.jp](mailto:kitagawa@osaka-cu.ac.jp); [kobatake@a-chem.eng.osaka-cu.ac.jp](mailto:kobatake@a-chem.eng.osaka-cu.ac.jp)

Table S1. Calculated activation energy ( $E_a$ ) for the thermal cycloreversion and energy gap ( $\Delta E$ ) between the open- and closed-ring isomers.

|          | Energy<br>(open-ring isomer)<br>/hartree | Energy<br>(closed-ring isomer)<br>/hartree | Energy<br>(transition state)<br>/hartree | $E_a$<br>/kJ mol <sup>-1a</sup> | $\Delta E$<br>/kJ mol <sup>-1b</sup> |
|----------|------------------------------------------|--------------------------------------------|------------------------------------------|---------------------------------|--------------------------------------|
| <b>1</b> | -2434.737169                             | -2434.715696                               | -2434.666894                             | 128.15                          | 56.39                                |
| <b>2</b> | -2273.147373                             | -2273.105085                               | -2273.083204                             | 57.46                           | 111.04                               |

<sup>a</sup> $E_a$  = Energy(transition state) – Energy(closed-ring isomer). <sup>b</sup> $\Delta E$  = Energy(closed-ring isomer) – Energy(open-ring isomer).

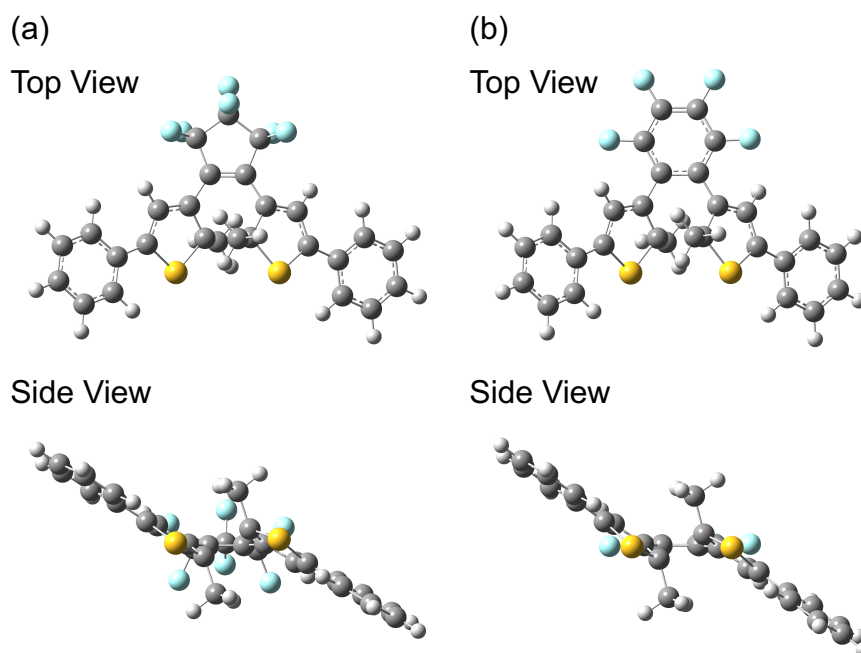

Fig. S1. Molecular structures of (a) **1** and (b) **2** in the transition state optimized at the B3LYP/6-31G(d) level.

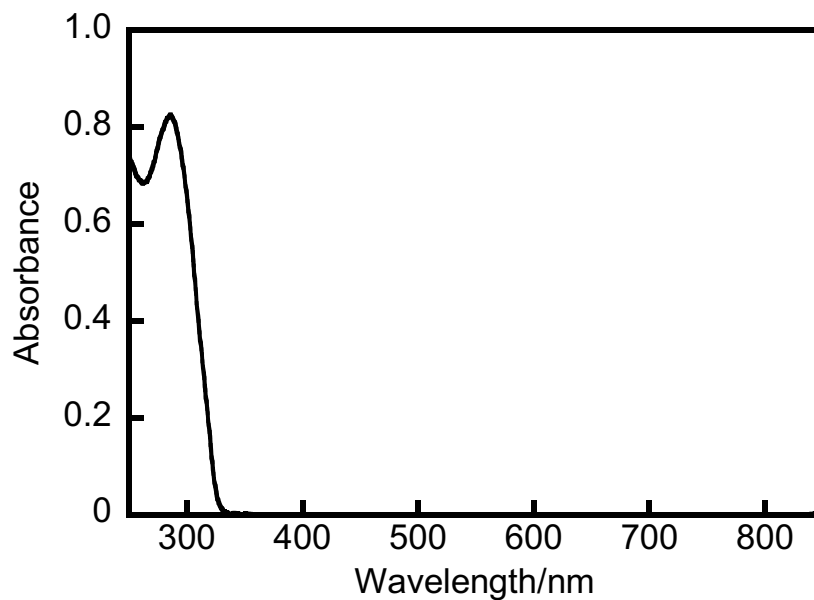

Fig. S2 Absorption spectrum of **2a** in *n*-hexane at 298 K ( $[\mathbf{2a}] = 2.7 \times 10^{-5}$  M).

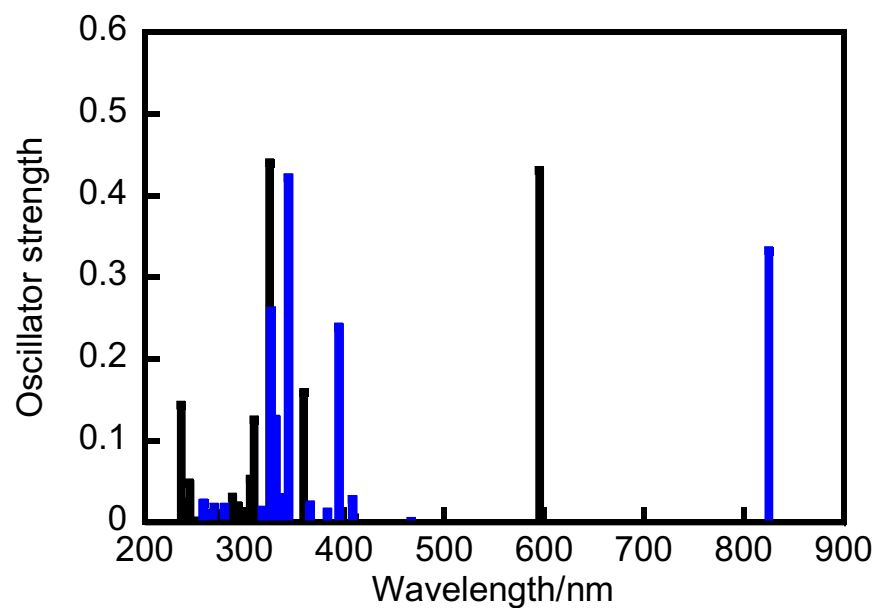

Fig. S3. Oscillator strength of **1b** (black line) and **2b** (blue line) calculated by time-dependent density functional theory (TD-DFT) at the B3LYP/6-31G(d) level.

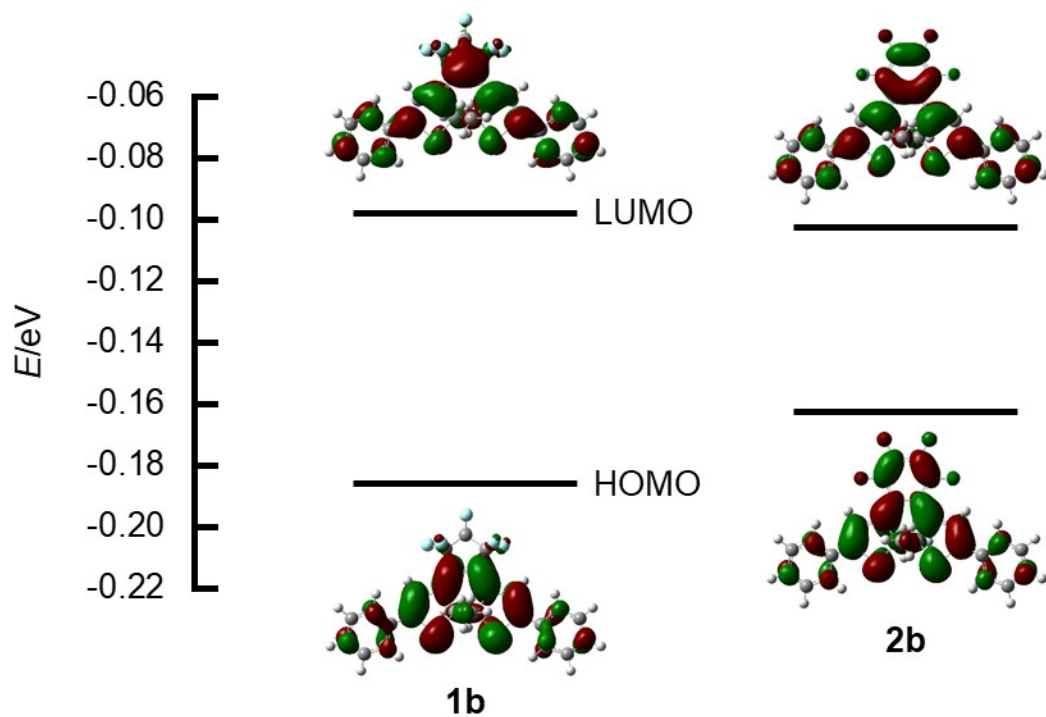

Fig. S4. Molecular orbitals and energies of **1b** and **2b** calculated by density functional theory (DFT) at the B3LYP/6-31G(d) level.

Table S2. HOMO and LUMO level data of **1b** and **2b** calculated by density functional theory (DFT) at the B3LYP/6-31G(d) level.

|           | $E_{\text{LUMO}}/\text{eV}$ | $E_{\text{HOMO}}/\text{eV}$ | $\Delta E_{\text{HOMO-LUMO gap}}/\text{eV}$ |
|-----------|-----------------------------|-----------------------------|---------------------------------------------|
| <b>1b</b> | -0.09753                    | -0.18541                    | -0.08788                                    |
| <b>2b</b> | -0.10185                    | -0.16258                    | -0.06073                                    |

### Kinetic analysis of thermal cycloreversion reaction

The reaction kinetics of the thermal cycloreversion was analyzed as follows: If the thermal cycloreversion reaction from the closed-ring isomer to the open-ring isomer obey a first-order kinetics, the kinetic equation is expressed as following equation by using Lambert-Beer law.

$$\ln \frac{A_t}{A_0} = -kt$$

where  $k$  is reaction rate constant,  $t$  is reaction time, and  $A_0$  and  $A_t$  are absorbance of the closed-ring isomer at initial state ( $t = 0$  s) and at arbitrary reaction time  $t$ , respectively. The  $k$  value can be calculated from the slope of the linear plot as shown in Fig. S5. The calculated  $k$  values are summarized in Table S3.

Arrhenius equation can be described as follows.

$$\ln k = \ln A - \frac{E_a}{RT}$$

where  $A$  is frequency factor,  $E_a$  is activation energy,  $R$  is gas constant, and  $T$  is absolute temperature. The linear relationship can be obtained by plotting  $\ln k$  relative to  $1/T$  as shown in Figure 4b. The  $E_a$  and  $A$  values can be determined from the slope and intercept of the linear plot. The results are summarized in Table 1.

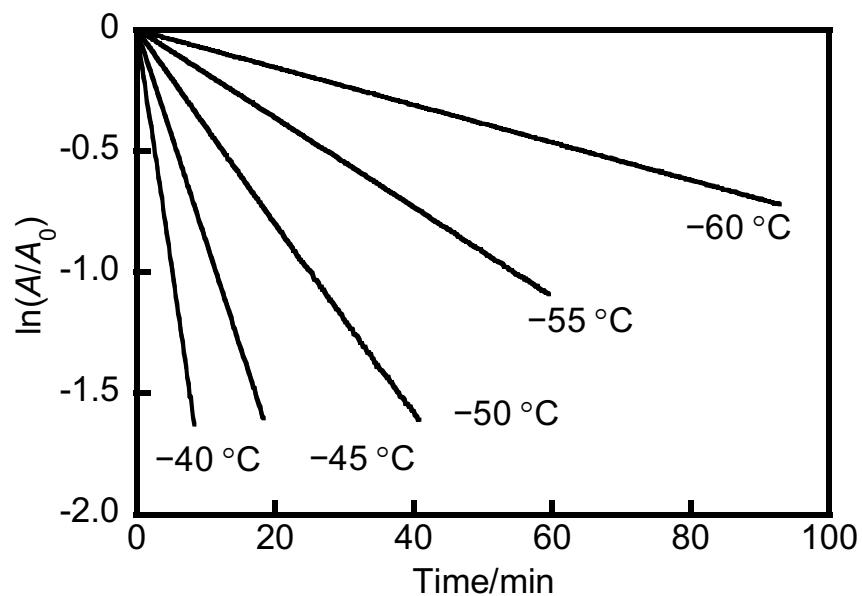

Fig. S5. First-order kinetic profiles of **2b** monitored at 745 nm in *n*-hexane.

Table S3. First-order rate constants for the thermal cycloreversion reaction of **2b**.

| $T/K$  | $k/s^{-1}$ |
|--------|------------|
| 233.15 | 0.003232   |
| 228.15 | 0.001453   |
| 223.15 | 0.000663   |
| 218.15 | 0.000305   |
| 213.15 | 0.000129   |

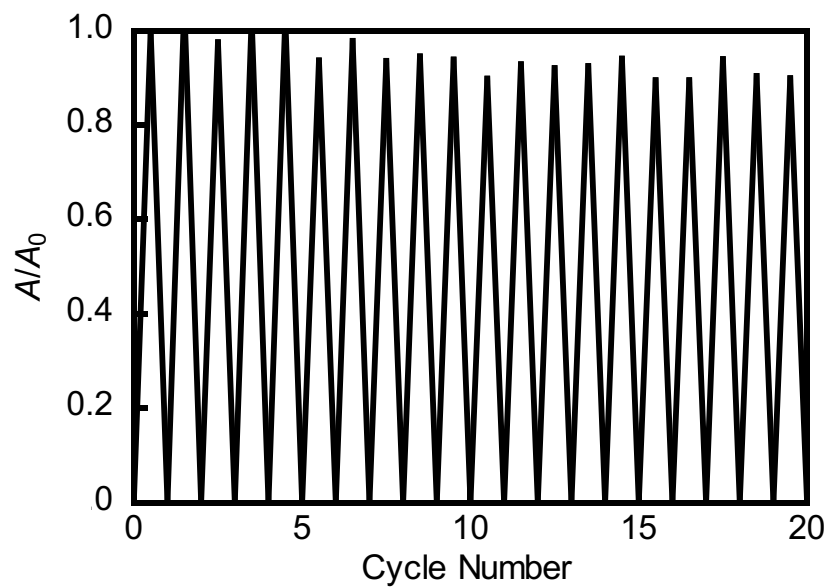

Fig. S6. Absorbance changes of **2b** in *n*-hexane upon cycles of alternating photoirradiation at 313 nm ( $0.63 \text{ mW cm}^{-2}$ ) for 150 s at 193 K and thermal bleaching at room temperature.

Table S4. X-ray crystallographic data for **2a**.

---

|                                          |                                                               |
|------------------------------------------|---------------------------------------------------------------|
| Formula                                  | C <sub>28</sub> H <sub>18</sub> F <sub>4</sub> S <sub>2</sub> |
| Formula weight                           | 494.54                                                        |
| Temperature/K                            | 150(2)                                                        |
| Crystal system                           | Orthorhombic                                                  |
| Space group                              | <i>P</i> 2 <sub>1</sub> 2 <sub>1</sub> 2 <sub>1</sub>         |
| Unit cell dimensions                     |                                                               |
| <i>a</i> /Å                              | 7.5411(3)                                                     |
| <i>b</i> /Å                              | 14.0447(5)                                                    |
| <i>c</i> /Å                              | 22.0416(9)                                                    |
| $\alpha$ /deg                            | 90                                                            |
| $\beta$ /deg                             | 90                                                            |
| $\gamma$ /deg                            | 90                                                            |
| Volume/Å <sup>3</sup>                    | 2334.48(16)                                                   |
| <i>Z</i>                                 | 4                                                             |
| Density/g cm <sup>-3</sup>               | 1.407                                                         |
| Goodness-of-fit on <i>F</i> <sup>2</sup> | 1.066                                                         |
| <i>R</i> ( <i>I</i> > 2σ( <i>I</i> ))    | <i>R</i> <sub>1</sub> = 0.0372                                |
| <i>R</i> (all data)                      | <i>wR</i> <sub>2</sub> = 0.0909                               |
| CCDC No.                                 | 1872163                                                       |

---



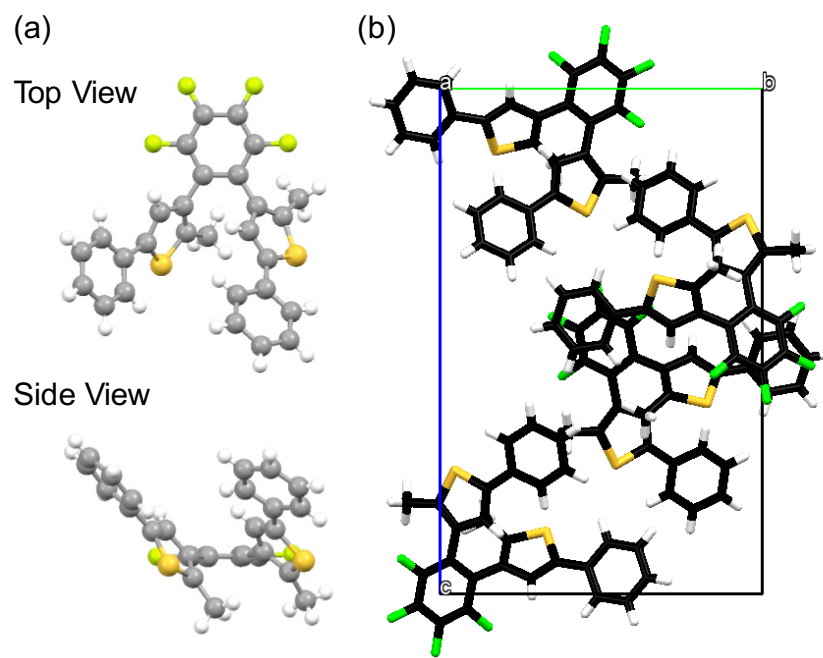

Fig. S7. (a) Molecular structure and (b) packing diagram of **2a** in crystal.

Table S5. Cartesian coordinates of **1a** optimized at the B3LYP/6-31G(d) level.

| Atom | X/Å       | Y/Å       | Z/Å       |
|------|-----------|-----------|-----------|
| C    | 1.254262  | 2.651505  | 0.128012  |
| C    | 0.032710  | 3.598297  | 0.178398  |
| C    | -1.128258 | 2.722625  | -0.352850 |
| C    | -0.655137 | 1.295236  | -0.180249 |
| C    | 0.662670  | 1.260078  | 0.149634  |
| C    | -1.572605 | 0.187332  | -0.482312 |
| C    | 1.535094  | 0.128860  | 0.479953  |
| C    | -2.901540 | 0.095276  | 0.054819  |
| H    | -3.313368 | 0.836005  | 0.727993  |
| C    | -3.610324 | -0.994231 | -0.380191 |
| C    | -1.281498 | -0.837749 | -1.364937 |
| C    | 1.210574  | -0.908203 | 1.335776  |
| C    | 2.875513  | 0.031020  | -0.027366 |
| H    | 3.289290  | 0.753261  | -0.720794 |
| C    | 3.562252  | -1.072950 | 0.404311  |
| S    | -2.632623 | -1.926471 | -1.501057 |
| S    | 2.551628  | -2.006276 | 1.495460  |
| C    | 4.932066  | -1.488406 | 0.076317  |
| C    | 7.564759  | -2.253636 | -0.576705 |
| C    | 5.323713  | -2.837973 | 0.122578  |

|   |           |           |           |
|---|-----------|-----------|-----------|
| C | 5.890258  | -0.528550 | -0.299033 |
| C | 7.188541  | -0.909420 | -0.628189 |
| C | 6.626849  | -3.214703 | -0.196027 |
| H | 4.597162  | -3.599943 | 0.392477  |
| H | 5.617903  | 0.522626  | -0.311035 |
| H | 7.912715  | -0.151126 | -0.913654 |
| H | 6.906479  | -4.263962 | -0.154678 |
| H | 8.579963  | -2.548084 | -0.827609 |
| C | -4.974164 | -1.403220 | -0.020141 |
| C | -7.597704 | -2.149840 | 0.690774  |
| C | -5.523153 | -1.021155 | 1.217847  |
| C | -5.766688 | -2.172279 | -0.890533 |
| C | -7.061787 | -2.544463 | -0.536201 |
| C | -6.822013 | -1.384433 | 1.564395  |
| H | -4.918849 | -0.451018 | 1.917238  |
| H | -5.372771 | -2.463412 | -1.860713 |
| H | -7.656578 | -3.136670 | -1.226377 |
| H | -7.225403 | -1.078175 | 2.525886  |
| H | -8.608739 | -2.437684 | 0.965036  |
| C | -0.046916 | -1.146552 | 2.116344  |
| H | -0.546712 | -0.197413 | 2.331064  |
| H | 0.165487  | -1.641831 | 3.069343  |

|   |           |           |           |
|---|-----------|-----------|-----------|
| H | -0.757928 | -1.772336 | 1.563133  |
| C | -0.044602 | -1.073416 | -2.179330 |
| H | 0.465566  | -0.126305 | -2.377759 |
| H | -0.285463 | -1.536857 | -3.141408 |
| H | 0.667758  | -1.726703 | -1.660589 |
| F | 1.951907  | 2.869672  | -1.035103 |
| F | 2.110120  | 2.888515  | 1.152698  |
| F | -0.210076 | 3.936697  | 1.468947  |
| F | 0.209893  | 4.722627  | -0.543118 |
| F | -2.280961 | 2.990128  | 0.327403  |
| F | -1.365088 | 3.011169  | -1.663999 |

---

Table S6. Cartesian coordinates of **1b** optimized at the B3LYP/6-31G(d) level.

| Atom | X/Å       | Y/Å       | Z/Å       |
|------|-----------|-----------|-----------|
| C    | -1.222696 | 2.986518  | 0.172954  |
| C    | -0.010871 | 3.836799  | -0.304748 |
| C    | 1.236428  | 2.986858  | 0.077776  |
| C    | 0.721715  | 1.578639  | 0.108326  |
| C    | -0.723892 | 1.578231  | 0.061674  |
| C    | 1.435073  | 0.420581  | 0.207718  |
| C    | -1.436292 | 0.426382  | -0.092509 |
| C    | -2.845727 | 0.207721  | -0.099515 |
| H    | -3.551127 | 1.029516  | -0.124156 |
| C    | -3.226550 | -1.105040 | -0.058415 |
| C    | -0.641497 | -0.857352 | -0.389055 |
| C    | 2.842355  | 0.201803  | 0.158029  |
| H    | 3.550163  | 1.022366  | 0.158076  |
| C    | 3.221548  | -1.110341 | 0.082048  |
| C    | 0.642184  | -0.870191 | 0.475641  |
| S    | 1.844350  | -2.238573 | 0.049113  |
| S    | -1.848294 | -2.233005 | 0.000384  |
| C    | -0.363443 | -0.898044 | -1.913754 |
| H    | 0.282104  | -0.064781 | -2.207952 |
| H    | -1.309428 | -0.810737 | -2.453900 |

|   |           |           |           |
|---|-----------|-----------|-----------|
| H | 0.120537  | -1.833046 | -2.202480 |
| C | 0.366241  | -0.947922 | 1.998877  |
| H | -0.278546 | -0.121810 | 2.314032  |
| H | 1.313064  | -0.873998 | 2.539689  |
| H | -0.117526 | -1.889625 | 2.265741  |
| C | -4.597441 | -1.624279 | -0.038458 |
| C | -7.241935 | -2.597346 | -0.014616 |
| C | -5.670349 | -0.793897 | 0.344181  |
| C | -4.880845 | -2.955471 | -0.397067 |
| C | -6.189087 | -3.434128 | -0.386905 |
| C | -6.975136 | -1.275168 | 0.352264  |
| H | -5.475555 | 0.227291  | 0.656100  |
| H | -4.072647 | -3.611655 | -0.705991 |
| H | -6.385172 | -4.463465 | -0.673999 |
| H | -7.786632 | -0.618671 | 0.653863  |
| H | -8.261689 | -2.971883 | -0.004807 |
| C | 4.591095  | -1.627775 | 0.004572  |
| C | 7.232899  | -2.598474 | -0.131290 |
| C | 5.647574  | -0.793259 | -0.412986 |
| C | 4.888952  | -2.961649 | 0.340907  |
| C | 6.195994  | -3.439154 | 0.275473  |
| C | 6.951214  | -1.273582 | -0.476573 |

|   |           |           |           |
|---|-----------|-----------|-----------|
| H | 5.440266  | 0.230106  | -0.709337 |
| H | 4.093845  | -3.620837 | 0.676377  |
| H | 6.403722  | -4.470568 | 0.546439  |
| H | 7.749851  | -0.614103 | -0.804787 |
| H | 8.251669  | -2.972051 | -0.184260 |
| F | -2.337053 | 3.245400  | -0.565751 |
| F | -1.510556 | 3.334592  | 1.467035  |
| F | -0.068093 | 3.949064  | -1.657093 |
| F | 0.011286  | 5.069929  | 0.235972  |
| F | 1.691227  | 3.397620  | 1.301870  |
| F | 2.258874  | 3.182334  | -0.804020 |

---

Table S7. Cartesian coordinates of transition state of **1** optimized at the B3LYP/6-31G(d) level.

| Atom | X/Å       | Y/Å       | Z/Å       |
|------|-----------|-----------|-----------|
| C    | 0.636455  | 1.598124  | 0.261004  |
| C    | 1.383495  | 0.38193   | 0.536034  |
| C    | 0.647573  | -0.851103 | 0.808247  |
| C    | -0.633762 | -0.853075 | -0.813733 |
| C    | -1.371705 | 0.37513   | -0.534238 |
| C    | -0.63832  | 1.590499  | -0.238371 |
| S    | -1.831082 | -2.192572 | -0.789631 |
| C    | -3.175774 | -1.13065  | -0.361906 |
| C    | -2.736457 | 0.190249  | -0.292757 |
| C    | 2.748623  | 0.198113  | 0.295765  |
| C    | 3.188338  | -1.123764 | 0.356687  |
| S    | 1.84491   | -2.189105 | 0.776588  |
| C    | 4.522061  | -1.63712  | 0.085091  |
| C    | -0.304787 | -0.944226 | 1.990196  |
| C    | 0.318653  | -0.939824 | -1.995964 |
| C    | -1.195952 | 2.97731   | -0.338022 |
| C    | 4.761501  | -3.016434 | -0.092266 |
| C    | 6.042144  | -3.49454  | -0.351781 |
| C    | 0.044929  | 3.901104  | -0.173378 |
| C    | 6.903609  | -1.243262 | -0.263782 |



|   |           |           |           |
|---|-----------|-----------|-----------|
| C | 1.122148  | 2.997116  | 0.494627  |
| C | 5.626332  | -0.7602   | -0.003379 |
| F | -0.223785 | 5.001283  | 0.55762   |
| F | 0.476506  | 4.284509  | -1.399692 |
| F | 2.355976  | 3.235626  | -0.046458 |
| F | 1.217034  | 3.290241  | 1.82392   |
| F | -1.835786 | 3.214814  | -1.513493 |
| F | -2.103496 | 3.233902  | 0.659996  |
| H | -1.028723 | -0.126853 | 1.974051  |
| H | -0.854395 | -1.890516 | 1.980551  |
| H | 0.256392  | -0.883025 | 2.928783  |
| H | 1.044657  | -0.124408 | -1.973187 |
| H | 0.866254  | -1.887287 | -1.992767 |
| H | -0.241863 | -0.870761 | -2.934421 |
| H | 3.933313  | -3.71769  | -0.039227 |
| H | 6.197023  | -4.561438 | -0.487929 |
| H | 7.735738  | -0.547011 | -0.324013 |
| H | 5.482534  | 0.304857  | 0.148786  |
| C | 7.121588  | -2.612813 | -0.44082  |
| H | 8.120994  | -2.98741  | -0.642776 |
| C | -4.509146 | -1.646859 | -0.09343  |
| C | -4.747273 | -3.027002 | 0.078278  |

|   |           |           |           |
|---|-----------|-----------|-----------|
| C | -5.614167 | -0.771219 | -0.00306  |
| C | -6.027845 | -3.507273 | 0.334286  |
| H | -3.918281 | -3.727162 | 0.023464  |
| C | -6.891308 | -1.256401 | 0.254105  |
| H | -5.471082 | 0.294478  | -0.151557 |
| C | -7.10815  | -2.62684  | 0.425482  |
| H | -6.181974 | -4.574835 | 0.46595   |
| H | -7.724171 | -0.561183 | 0.315952  |
| H | -8.107481 | -3.003159 | 0.624591  |
| H | 3.396567  | 1.017373  | 0.009012  |
| H | -3.381608 | 1.00767   | 0.008905  |

---

Table S8. Cartesian coordinates of **2a** optimized at the B3LYP/6-31G(d) level.

| Atom | X/Å       | Y/Å       | Z/Å       |
|------|-----------|-----------|-----------|
| C    | 0.651362  | 4.158176  | 0.241900  |
| C    | -0.660541 | 1.711563  | -0.259521 |
| C    | -0.651393 | 4.158180  | -0.241846 |
| C    | 1.285522  | 2.944040  | 0.484417  |
| C    | 0.660523  | 1.711558  | 0.259478  |
| C    | -1.285547 | 2.944051  | -0.484414 |
| C    | 1.420620  | 0.476238  | 0.590709  |
| C    | -1.420634 | 0.476250  | -0.590780 |
| C    | -2.678364 | 0.158942  | 0.020062  |
| H    | -3.149464 | 0.802307  | 0.754767  |
| C    | 2.678349  | 0.158934  | -0.020119 |
| H    | 3.149450  | 0.802291  | -0.754831 |
| C    | 3.250791  | -1.003316 | 0.430265  |
| C    | 1.044302  | -0.446691 | 1.542930  |
| C    | -1.044326 | -0.446670 | -1.543003 |
| C    | -3.250783 | -1.003328 | -0.430291 |
| S    | -2.222183 | -1.727306 | -1.654300 |
| S    | 2.222189  | -1.727283 | 1.654281  |
| C    | -4.513540 | -1.626327 | -0.013816 |
| C    | -6.946225 | -2.792683 | 0.809128  |

|   |           |           |           |
|---|-----------|-----------|-----------|
| C | -5.234640 | -2.475767 | -0.871902 |
| C | -5.036758 | -1.379263 | 1.269155  |
| C | -6.241737 | -1.949601 | 1.671449  |
| C | -6.433856 | -3.055043 | -0.462548 |
| H | -4.861975 | -2.668874 | -1.874319 |
| H | -4.482874 | -0.750199 | 1.959867  |
| H | -6.625526 | -1.744172 | 2.667280  |
| H | -6.973735 | -3.706667 | -1.144376 |
| H | -7.882931 | -3.242455 | 1.126313  |
| C | 4.513565  | -1.626305 | 0.013832  |
| C | 6.946279  | -2.792650 | -0.809048 |
| C | 5.036821  | -1.379235 | -1.269123 |
| C | 5.234645  | -2.475742 | 0.871937  |
| C | 6.433875  | -3.055013 | 0.462612  |
| C | 6.241812  | -1.949567 | -1.671387 |
| H | 4.482955  | -0.750170 | -1.959850 |
| H | 4.861958  | -2.668853 | 1.874344  |
| H | 6.973736  | -3.706635 | 1.144455  |
| H | 6.625628  | -1.744132 | -2.667206 |
| H | 7.882994  | -3.242420 | -1.126208 |
| C | -0.160379 | -0.458123 | 2.435728  |
| H | -0.591158 | 0.545214  | 2.500363  |

|   |           |           |           |
|---|-----------|-----------|-----------|
| H | 0.099120  | -0.779759 | 3.450265  |
| H | -0.941116 | -1.129981 | 2.059513  |
| C | 0.160321  | -0.458084 | -2.435852 |
| H | 0.941160  | -1.129784 | -2.059564 |
| H | 0.590975  | 0.545295  | -2.500664 |
| H | -0.099179 | -0.779915 | -3.450325 |
| F | -1.278777 | 5.314494  | -0.483249 |
| F | -2.537099 | 2.989701  | -0.973468 |
| F | 1.278741  | 5.314481  | 0.483344  |
| F | 2.537079  | 2.989678  | 0.973460  |

---

Table S9. Cartesian coordinates of **2b** optimized at the B3LYP/6-31G(d) level.

| Atom | X/Å       | Y/Å       | Z/Å       |
|------|-----------|-----------|-----------|
| C    | 0.708926  | 4.218600  | -0.031568 |
| C    | -1.398209 | 3.039378  | -0.108884 |
| C    | 0.738125  | 1.763809  | -0.031848 |
| C    | -0.742113 | 1.762817  | -0.009150 |
| C    | 1.392322  | 3.044429  | 0.018025  |
| C    | -0.716564 | 4.215763  | -0.108062 |
| C    | -1.433946 | 0.561595  | 0.132325  |
| C    | 1.431876  | 0.559552  | -0.123913 |
| C    | 2.829385  | 0.303402  | -0.080055 |
| H    | 3.563465  | 1.095195  | -0.079954 |
| C    | -2.829122 | 0.300498  | 0.077063  |
| H    | -3.561268 | 1.088385  | -0.016641 |
| C    | -3.191838 | -1.024228 | 0.083813  |
| C    | 3.193741  | -1.019772 | -0.035275 |
| C    | -0.630925 | -0.701034 | 0.467634  |
| S    | -1.796366 | -2.121904 | 0.124444  |
| S    | 1.798740  | -2.117889 | -0.002340 |
| C    | 0.630637  | -0.717144 | -0.406708 |
| C    | 4.554462  | -1.555231 | 0.003402  |
| C    | 7.184404  | -2.577690 | 0.071673  |

|   |           |           |           |
|---|-----------|-----------|-----------|
| C | 5.649287  | -0.724150 | 0.323253  |
| C | 4.813595  | -2.912777 | -0.270902 |
| C | 6.112122  | -3.415181 | -0.238470 |
| C | 6.944052  | -1.229415 | 0.353522  |
| H | 5.480497  | 0.319631  | 0.567691  |
| H | 3.992046  | -3.573474 | -0.531432 |
| H | 6.285523  | -4.464768 | -0.459667 |
| H | 7.770047  | -0.569846 | 0.605431  |
| H | 8.197023  | -2.970264 | 0.098548  |
| C | -4.550620 | -1.561098 | 0.037487  |
| C | -7.176918 | -2.588834 | -0.076228 |
| C | -4.787548 | -2.921507 | -0.242976 |
| C | -5.667185 | -0.729819 | 0.269592  |
| C | -6.960047 | -1.237576 | 0.209715  |
| C | -6.083617 | -3.427007 | -0.300139 |
| H | -3.949625 | -3.587155 | -0.429704 |
| H | -5.518509 | 0.316638  | 0.515585  |
| H | -7.803185 | -0.577806 | 0.395525  |
| H | -6.238897 | -4.479242 | -0.522012 |
| H | -8.188077 | -2.983740 | -0.118878 |
| C | -0.344109 | -0.702657 | 1.993925  |
| H | -1.292797 | -0.633651 | 2.531840  |

|   |           |           |           |
|---|-----------|-----------|-----------|
| H | 0.276936  | 0.154200  | 2.271438  |
| H | 0.167266  | -1.616930 | 2.301262  |
| C | 0.343334  | -0.780096 | -1.931323 |
| H | -0.278058 | 0.064478  | -2.243645 |
| H | -0.167723 | -1.706624 | -2.200324 |
| H | 1.291834  | -0.732180 | -2.471978 |
| F | 2.739436  | 3.108831  | 0.067661  |
| F | 1.340101  | 5.399488  | -0.013137 |
| F | -1.350068 | 5.393879  | -0.171058 |
| F | -2.745640 | 3.100700  | -0.154836 |

---



Table S10. Cartesian coordinates of transition state of **2** optimized at the B3LYP/6-31G(d) level.

| Atom | X/Å       | Y/Å       | Z/Å       |
|------|-----------|-----------|-----------|
| C    | -0.713385 | -0.070552 | 1.792418  |
| C    | 0.713385  | 0.070552  | 1.792418  |
| C    | 1.370224  | 0.124323  | 3.019784  |
| C    | 0.68962   | 0.062972  | 4.239216  |
| C    | -0.68962  | -0.062972 | 4.239216  |
| C    | -1.370224 | -0.124323 | 3.019784  |
| C    | -1.442795 | -0.208941 | 0.519186  |
| C    | -2.491067 | -1.107987 | 0.302489  |
| C    | -2.881794 | -1.267285 | -1.02626  |
| H    | -2.927685 | -1.690728 | 1.104348  |
| C    | 1.442795  | 0.208941  | 0.519186  |
| C    | 2.491067  | 1.107987  | 0.302489  |
| C    | 2.881794  | 1.267285  | -1.02626  |
| H    | 2.927685  | 1.690728  | 1.104348  |
| S    | -1.92399  | -0.211928 | -2.062012 |
| S    | 1.92399   | 0.211928  | -2.062012 |
| C    | -0.912625 | 0.390834  | -0.697668 |
| C    | 0.912625  | -0.390834 | -0.697668 |
| C    | -0.68962  | 1.895073  | -0.782864 |
| H    | -1.65059  | 2.41544   | -0.71781  |

|   |           |           |           |
|---|-----------|-----------|-----------|
| H | -0.057091 | 2.24384   | 0.036148  |
| H | -0.213163 | 2.172052  | -1.728267 |
| C | 0.68962   | -1.895073 | -0.782864 |
| H | 1.65059   | -2.41544  | -0.71781  |
| H | 0.057091  | -2.24384  | 0.036148  |
| H | 0.213163  | -2.172052 | -1.728267 |
| F | -2.711952 | -0.232738 | 3.077553  |
| F | -1.365568 | -0.120896 | 5.391941  |
| F | 1.365568  | 0.120896  | 5.391941  |
| F | 2.711952  | 0.232738  | 3.077553  |
| C | 3.880269  | 2.178107  | -1.56349  |
| C | 3.958137  | 2.460138  | -2.944292 |
| C | 4.815241  | 2.807221  | -0.710843 |
| C | 4.918637  | 3.333032  | -3.445938 |
| H | 3.248944  | 2.000428  | -3.627144 |
| C | 5.772031  | 3.679368  | -1.21747  |
| H | 4.801437  | 2.594927  | 0.353664  |
| C | 5.831487  | 3.950187  | -2.587778 |
| H | 4.95212   | 3.53426   | -4.513371 |
| H | 6.480946  | 4.146569  | -0.538999 |
| H | 6.581712  | 4.630411  | -2.980784 |
| C | -3.880269 | -2.178107 | -1.56349  |

|   |           |           |           |
|---|-----------|-----------|-----------|
| C | -3.958137 | -2.460138 | -2.944292 |
| C | -4.815241 | -2.807221 | -0.710843 |
| C | -4.918637 | -3.333032 | -3.445938 |
| H | -3.248944 | -2.000428 | -3.627144 |
| C | -5.772031 | -3.679368 | -1.21747  |
| H | -4.801437 | -2.594927 | 0.353664  |
| C | -5.831487 | -3.950187 | -2.587778 |
| H | -4.95212  | -3.53426  | -4.513371 |
| H | -6.480946 | -4.146569 | -0.538999 |
| H | -6.581712 | -4.630411 | -2.980784 |

---
